# Supplementary material for: A Cocktail of Lipid Nanoparticle-mRNA Vaccines Broaden Immune Responses against β-Coronaviruses in a Murine Model
Source: MDPI journal article supplement (doi:10.3390/v16030484), 2024-03-21
Supplement: s1 [file s1]

## Appendix A

**Table S1.** Mutation sites of the encoding mRNA from BA.4&5 and Delta

| WHO label | Pango lineage | Mutation site                                                                                                                                                                                        |
|-----------|---------------|------------------------------------------------------------------------------------------------------------------------------------------------------------------------------------------------------|
| Delta     | B.1.617.2     | T19R, G142D*, 156del, 157del, R158G, L452R, T478K, D614G, P681R, D950N                                                                                                                               |
| Omicron   | BA.4&5        | A67V, D69–70, T95I, D143–145, G339D, S371L, S373P, K417N, N440K, G446S, S477N, T478K, E484A, G496S, Q498R, N501Y, P681H, T547K, D614G, H655Y, N679K, N764K, D796Y, N856K, Q954H, N969K, L452R, F486V |

**Table S2.** Immunization schedule for sequential and cocktail immunization strategy

| Immunization strategy | Group    | Prime<br>100 µL               | Boost 1<br>100 µL             | Boost 2<br>100 µL             |
|-----------------------|----------|-------------------------------|-------------------------------|-------------------------------|
| Sequential            | S-M-O-D  | S<br>6 µg                     | M<br>6 µg                     | O, D<br>6 µg/LNP-mRNA         |
| Cocktail              | OD       | O, D<br>6 µg/LNP-mRNA         | O, D<br>6 µg/LNP-mRNA         | O, D<br>6 µg/LNP-mRNA         |
|                       | SMOD(Hd) | S, M, O, D<br>6 µg/LNP-mRNA   | S, M, O, D<br>6 µg/LNP-mRNA   | S, M, O, D<br>6 µg/LNP-mRNA   |
|                       | SMOD(Ld) | S, M, O, D<br>1.5 µg/LNP-mRNA | S, M, O, D<br>1.5 µg/LNP-mRNA | S, M, O, D<br>1.5 µg/LNP-mRNA |
| Control               | Blank    | PBS                           | PBS                           | PBS                           |

1. Cao, Y.; Yisimayi, A.; Jian, F.; Song, W.; Xiao, T.; Wang, L.; Du, S.; Wang, J.; Li, Q.; Chen, X.; Yu, Y.; Wang, P.; Zhang, Z.; Liu, P.; An, R.; Hao, X.; Wang, Y.; Wang, J.; Feng, R.; Sun, H.; Zhao, L.; Zhang, W.; Zhao, D.; Zheng, J.; Yu, L.; Li, C.; Zhang, N.; Wang, R.; Niu, X.; Yang, S.; Song, X.; Chai, Y.; Hu, Y.; Shi, Y.; Zheng, L.; Li, Z.; Gu, Q.; Shao, F.; Huang, W.; Jin, R.; Shen, Z.; Wang, Y.; Wang, X.; Xiao, J.; Xie, X. S., BA.2.12.1, BA.4 and BA.5 escape antibodies elicited by Omicron infection. *Nature* **2022**, 608 (7923), 593-602.
